# Supplementary material for: A combined DFT-predictive and experimental exploration of the sensitivity towards nucleofuge variation in zwitterionic intermediates relating to mechanistic models for unimolecular chemical generation and trapping of free C 2 and alternative bimolecular pathways involving no free C 2
Source: Royal Society of Chemistry journal article supplement (doi:10.1039/d2cp01214f), 2022-01-01
Supplement: d2cp01214f1.pdf [file d2cp01214f1.pdf]

**A combined DFT-predictive and experimental exploration of the sensitivity towards nucleofuge variation in zwitterionic intermediates relating to mechanistic models for unimolecular chemical generation and trapping of free C<sub>2</sub> and alternative bimolecular pathways involving no free C<sub>2</sub>.**

**Henry S. Rzepa,<sup>\*</sup> Miki Arita,<sup>†</sup> Kazunori Miyamoto,<sup>†,\*</sup> Masanobu Uchiyama<sup>†,‡,\*</sup>**

Department of Chemistry, Molecular Sciences Research Hub, Imperial College London, White City Campus, Wood Lane, London W12 0BZ, UK.

<sup>†</sup> Graduate School of Pharmaceutical Sciences, The University of Tokyo, 7-3-1 Hongo, Bunkyo-ku, Tokyo 113-0033, Japan.

<sup>‡</sup> Research Initiative for Supra-Materials (RISM), Shinshu University, Ueda, 386-8567.

|                                                        |   |
|--------------------------------------------------------|---|
| 1. General Information                                 | 2 |
| 2. Experimental Details                                | 3 |
| 3. References                                          | 6 |
| 4. Copies of <sup>1</sup> H NMR spectra and GCMS chart | 7 |

## 1. General Information

### Instructions.

NMR spectra were obtained either on a BRUKER AVANCE III HD 500 or Avance III HD 400 MHz spectrometer. Chemical shifts were reported in ppm on the  $\delta$  scale relative to tetramethylsilane ( $\delta = 0$  ppm for  $^1\text{H}$  NMR). GCMS: Mass spectra (MS) were obtained on either an Agilent 7890A/5975C or 7890B/5977A spectrometers with VF-5ms (agilent) or CP-PoraPLOT Q column (GL science). APCI mass spectra were measured on a Bruker compact spectrometer. Raman spectra were obtained on either a NRS-4500 spectrometer.

**Substrates.** Iodoalkyne **1a**, alkynyl(aryl)- $\lambda^3$ -iodane **1b**, *N*-alkynylpyridinium salt **1c**, and *S*-alkynylsulfonium salt **1d** were prepared according to the reported procedures.<sup>S1-S4</sup> All of these starting materials used were greater than 99% purity, which was confirmed by  $^1\text{H}$  NMR.  $^1\text{H}$  NMR spectra of **1a-d** were shown in section 4, Copies of  $^1\text{H}$  NMR spectra and GCMS chart. Tetrabutylammonium fluoride trihydrate ( $\geq 98\%$ ), 9,10-dihydroanthracene ( $>98.0\%$ (GC)), galvinoxyl free radical, iodobenzene ( $>99.0\%$ (GC)), 4-phenylpyridine ( $>98.0\%$ (GC)), and dibenzothiophene ( $>98.0\%$ (GC)) were purchased from Tokyo Kasei Co. The purity of these reagents (except for galvinoxyl free radical) was also confirmed by  $^1\text{H}$  NMR (NMR spectra were shown in section 4, Copies of  $^1\text{H}$  NMR spectra and GCMS chart) prior to use. The purity of galvinoxyl free radical was confirmed by GC/GCMS and was determined to be  $>99\%$ . Dichloromethane ( $>99.5\%$ (GC)) was purchased from Kanto Chemical Co., Inc., degassed by purging with argon, and dried with a solvent purification system containing a one-meter column of activated alumina.

All trapping reactions were carried out either in a two-necked flask or connected flasks under an argon atmosphere.

## 2. Experimental Details

**General procedure.** To a stirred solution of C<sub>2</sub>-precursor **1** (0.065 mmol) and trapping agent (50 equivalent for 9,10-dihydroanthracene and 1.2 equivalent for galvinoxyl radical) in dichloromethane (1.3 mL), tetrabutylammonium fluoride trihydrate (1.2 equivalent) was added in one portion at -78 °C and the solution was gradually warmed to room temperature for 3–72 h (disappearance of starting material was monitored by <sup>1</sup>H NMR, except for **1a**). After concentration of the reaction mixture under a reduced pressure, the resulting residue was then analyzed by <sup>1</sup>H NMR (ethyl acetate as an internal standard) and APCIMS. For the trapping reaction with galvinoxyl radical, excess 1,4-cyclohexadiene was added (in order to quench remaining galvinoxyl radical) prior to <sup>1</sup>H NMR measurement. The formation of acetylene was confirmed by GCMS with PLOT column (Rt-U-Bond, 0.25 mm x 30 m, 30 °C) or silver nitrate testing.

**Solvent-free connected flask experiment.** *S*-(trimethylsilylethynyl)-dibenzothiophenium salt **1d** (33 mg, 0.077 mmol) and cesium fluoride (35.0 mg, 0.231 mmol) was placed in one of a pair of connected flasks (Flask A), and galvinoxyl radical (97 mg, 0.231 mmol) was placed in the other flask (Flask B). The reaction mixture in Flask A was vigorously stirred at room temperature for 48 hours under argon. The contents of Flask B were directly analyzed by APCI mass spectrometry. The contents of Flask A were analyzed by <sup>1</sup>H NMR (ethyl acetate was an internal standard).

### 2-1. Starting materials

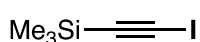

**1a**

**1-Iodo-2-(trimethylsilyl)acetylene (1a):**<sup>S1</sup> <sup>1</sup>H NMR (500 MHz, CDCl<sub>3</sub>) δ 0.17 (s, 9H); EIMS *m/z* (relative intensity) 224 (16%, M<sup>+</sup>), 209 (100), 155 (6), 127 (21), 97 (16).

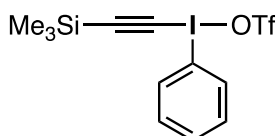

**1b**

**[2-(Trimethylsilyl)ethynyl](phenyl)(triflate)-λ<sup>3</sup>-iodane (1b):**<sup>S2</sup> <sup>1</sup>H NMR (500 MHz, CDCl<sub>3</sub>): δ 8.10 (d, *J* = 8.7 Hz, 2H), 7.71 (tt, *J* = 7.5, 1.0 Hz, 1H), 7.59 (dd, *J* = 8.7, 7.5 Hz, 2H), 0.28 (s, 9H).

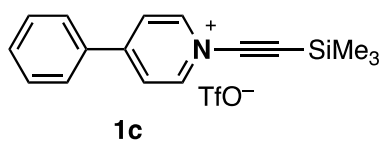

***N*-[2-(Trimethylsilyl)ethynyl]-4-phenylpyridinium triflate (1c):**<sup>S3</sup> <sup>1</sup>H NMR (500 MHz, CDCl<sub>3</sub>): δ 8.83 (d, *J* = 7.0 Hz, 2H), 8.44 (d, *J* = 7.0 Hz, 2H), 7.89 (d, *J* = 8.2 Hz, 2H), 7.57 (t, *J* = 7.2 Hz, 1H), 7.51 (dd, *J* = 8.2, 7.2 Hz, 2H), 0.28 (s, 9H).

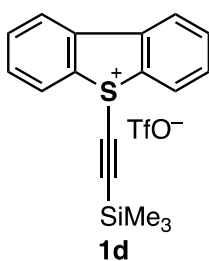

***S*-[2-(Trimethylsilyl)ethynyl]dibenzothiophenium triflate (1d):**<sup>S4</sup> <sup>1</sup>H NMR (500 MHz, CDCl<sub>3</sub>): δ 8.44 (d, *J* = 8.0 Hz, 2H), 8.10 (dd, *J* = 7.9, 0.9 Hz, 2H), 7.89 (td, *J* = 7.7, 0.9 Hz, 2H), 7.77 (td, *J* = 7.7, 0.9 Hz, 2H), 0.26 (s, 9H).

## 2-2. Products

The formation of acetylene was confirmed by GCMS with CP-PoraPLOT Q column (GL science, 0.25 mm x 25 m) or Raman spectroscopy.

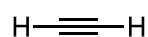

**Acetylene:**<sup>S5</sup> Raman ( $\nu$ ): 1974 cm<sup>-1</sup>; EIMS *m/z* (relative intensity): 26 (100%, M<sup>+</sup>), 25 (22), 24 (6).

The formation of **4a** was confirmed by <sup>1</sup>H NMR and APCI mass analyses of the reaction mixture. The product was purified by preparative TLC (hexane:ethyl acetate = 14:1, using a PLC plate pre-developed with dichloromethane:triethylamine = 5:1).<sup>S6</sup>

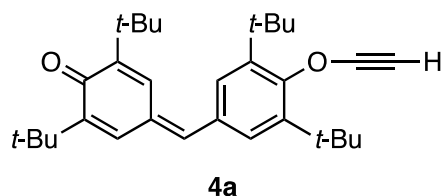

**4a:**<sup>S6</sup> <sup>1</sup>H NMR (500 MHz, CDCl<sub>3</sub>): δ 7.50 (d, *J* = 2.2 Hz, 1H), 7.41 (s, 2H), 7.15 (s, 1H), 7.01 (d, *J* = 2.2 Hz, 1H), 1.78 (s, 1H), 1.40–1.25 (m, 36H). APCIMS *m/z* (positive ion mode): 447 [M+H]<sup>+</sup>.

The formation of anthracene (**5**) was confirmed by <sup>1</sup>H NMR and GCMS analyses of the reaction mixture. The product was purified by column chromatography using hexane as an eluent.

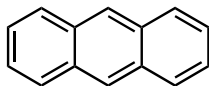

**5**

**Anthracene (5):**<sup>S7</sup> <sup>1</sup>H NMR (500 MHz, CDCl<sub>3</sub>): δ 8.44 (s, 2H), 8.02–8.00 (m, 4H), 7.46–7.44 (m, 4H); EIMS *m/z* (relative intensity) 178 (100%, M<sup>+</sup>), 176 (19), 152 (11), 151 (9), 77 (9), 76 (11).

The <sup>1</sup>H NMR data of following products were in agreement with those obtained by commercially available authentic samples. See section 4, Copies of <sup>1</sup>H NMR spectra and GCMS chart.

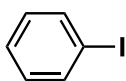

**Iodobenzene:**<sup>S8</sup> <sup>1</sup>H NMR (500 MHz, CDCl<sub>3</sub>): δ 7.70 (dd, *J* = 8.1, 1.1 Hz, 2H), 7.33 (tt, *J* = 7.5, 1.1 Hz, 1H), 7.11 (dd, *J* = 8.1, 7.5 Hz, 2H).

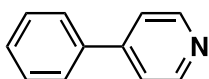

**4-Phenylpyridine:**<sup>S9</sup> <sup>1</sup>H NMR (500 MHz, CDCl<sub>3</sub>): δ 8.66 (dd, *J* = 6.1, 2.8 Hz, 2H), 7.65 (br d, *J* = 8.0 Hz, 2H), 7.54–7.47 (m, 4H), 7.44 (tt, *J* = 7.2, 1.1 Hz, 1H).

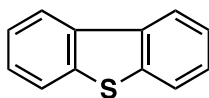

**Dibenzothiophene:**<sup>S10</sup> <sup>1</sup>H NMR (500 MHz, CDCl<sub>3</sub>): δ 8.20–8.13 (m, 2H), 7.90–7.82 (m, 2H), 7.50–7.42 (m, 4H).

## References

- S1 D. R. M. Walton, M. J. Webb. *J. Organomet. Chem.* **1972**, *37*, 41–43.
- S2 T. Kitamura, M. Kotani, Y. Fujiwara, *Synthesis* **1998**, 1416–1418.
- S3 N. Toriumi, N. Asano, K. Miyamoto, A. Muranaka, M. Uchiyama, *J. Am. Chem. Soc.* **2018**, *140*, 3858–3862.
- S4 B. Waldecker, F. Kraft, C. Golz, M. Alcarazo, *Angew. Chem. Int. Ed.* **2018**, *57*, 12538–12542.
- S5 H. Fast, H. L. Welsh, *J. Mol. Spect.* **1972**, *41*, 203–221.
- S6 K. Miyamoto, S. Narita, Y. Masumoto, T. Hashishin, T. Osawa, M. Kimura, M. Ochiai, M. Uchiyama, *Nat. Commun.* **2020**, *11*, 2134.
- S7 M. Tobisu, R. Nakamura, Y. Kita, N. Chatani, *J. Am. Chem. Soc.* **2009**, *131*, 3174–3175.
- S8 B. Zhang, X. Li, X. Li, Z. Yu, B. Zhao, X. Wang, Y. Du, K. Zhao, *J. Org. Chem.* **2021**, *86*, 17274–17281.
- S9 L. Ackermann, H. K. Potukuchi, A. Althammer, R. Born, P. Mayer, *Org. Lett.* **2010**, *12*, 1004–1007.
- S10 G. K. S. Prakash, C. Weber, S. Chacko, G. A. Olah, *Org. Lett.* **2007**, *9*, 1863–1866.

### 3. Copies of $^1\text{H}$ NMR spectra and GCMS chart

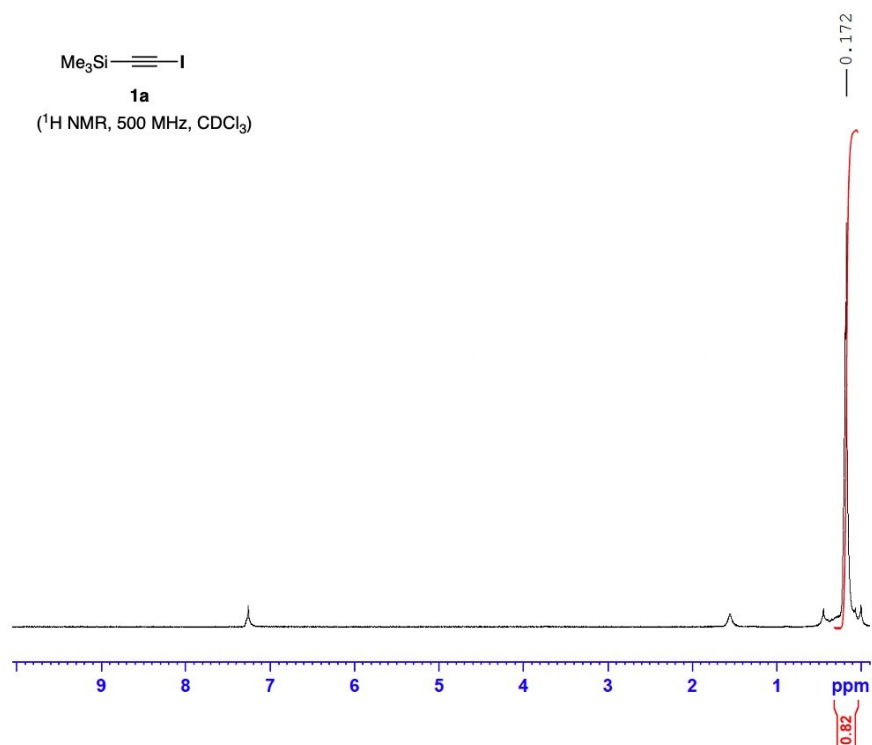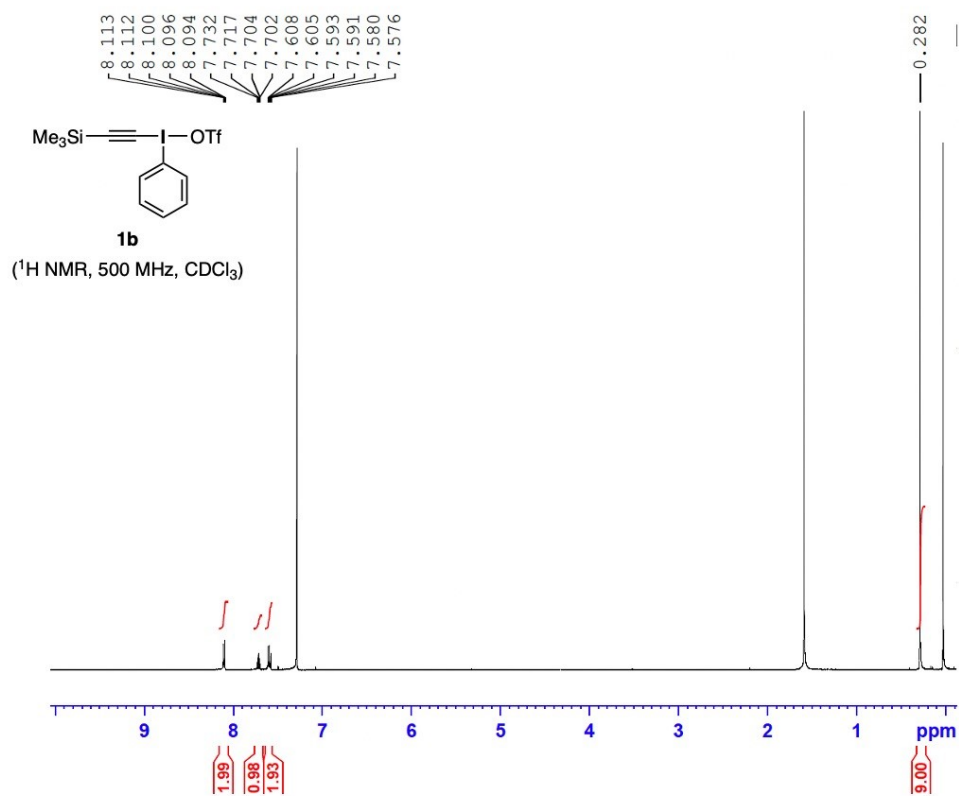

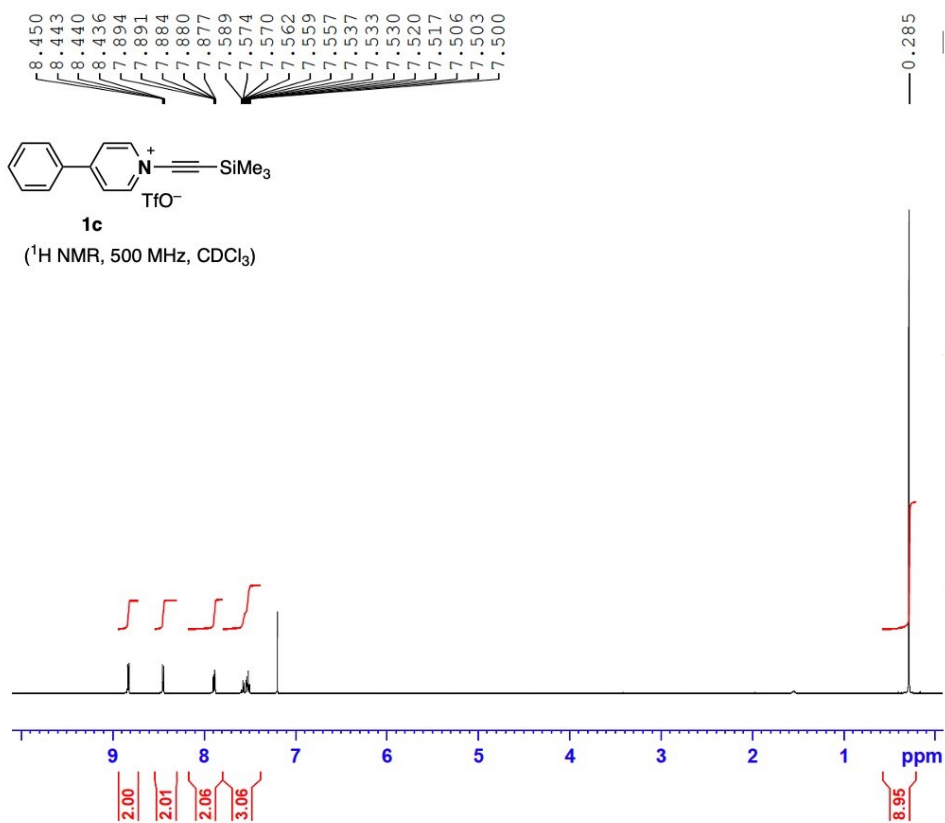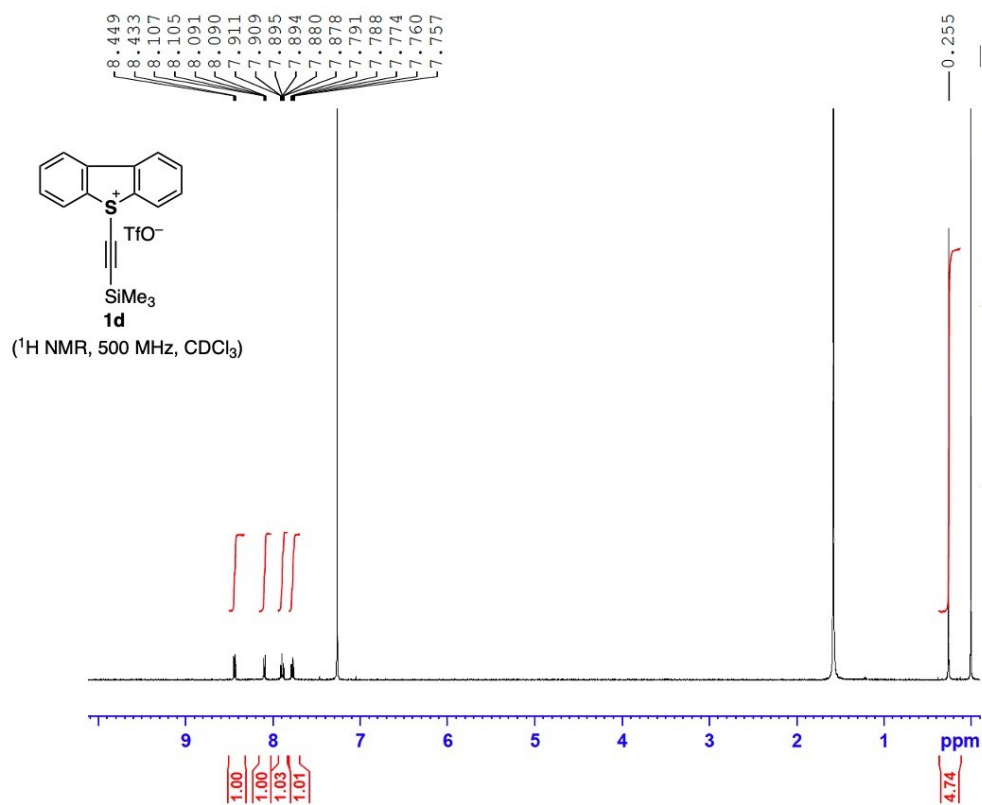



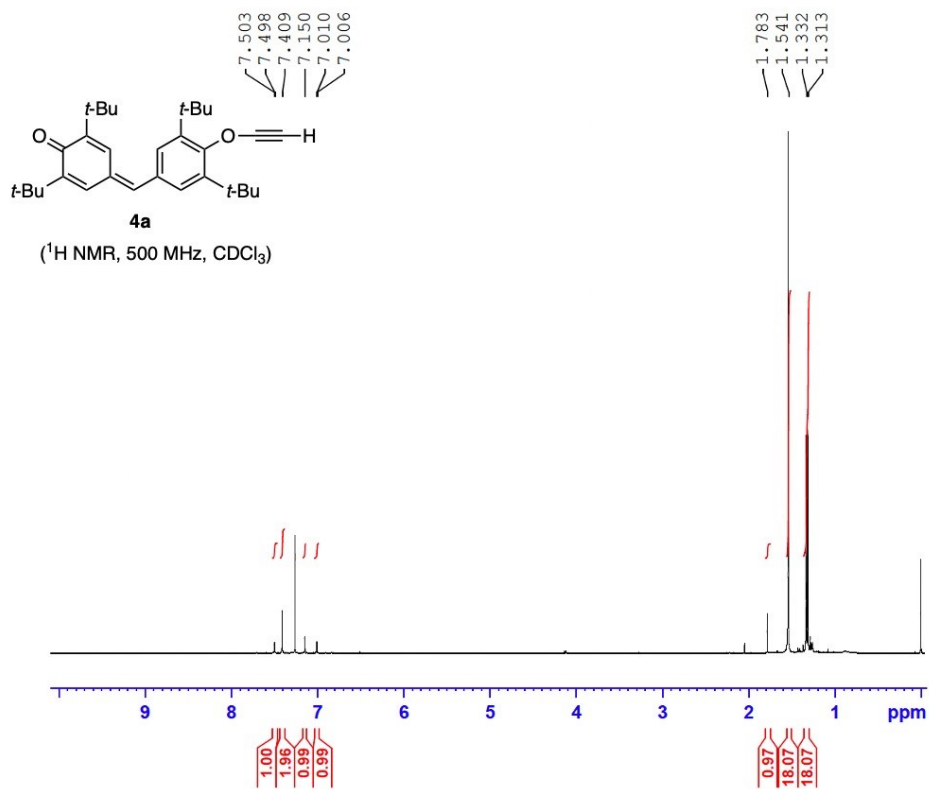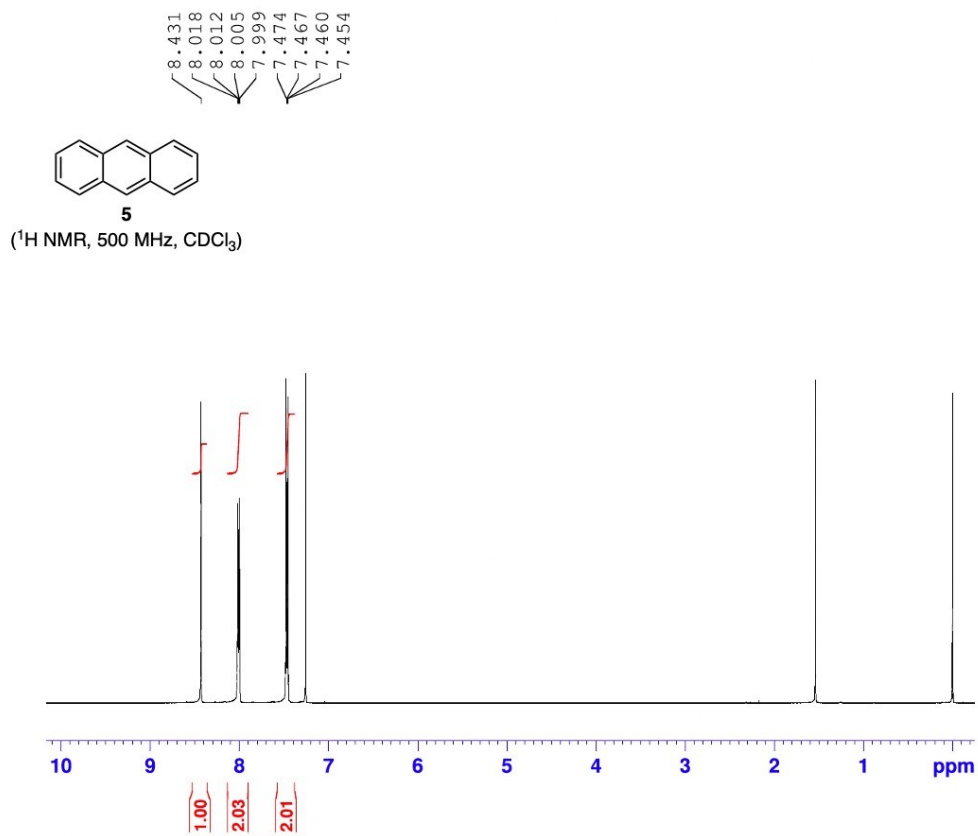

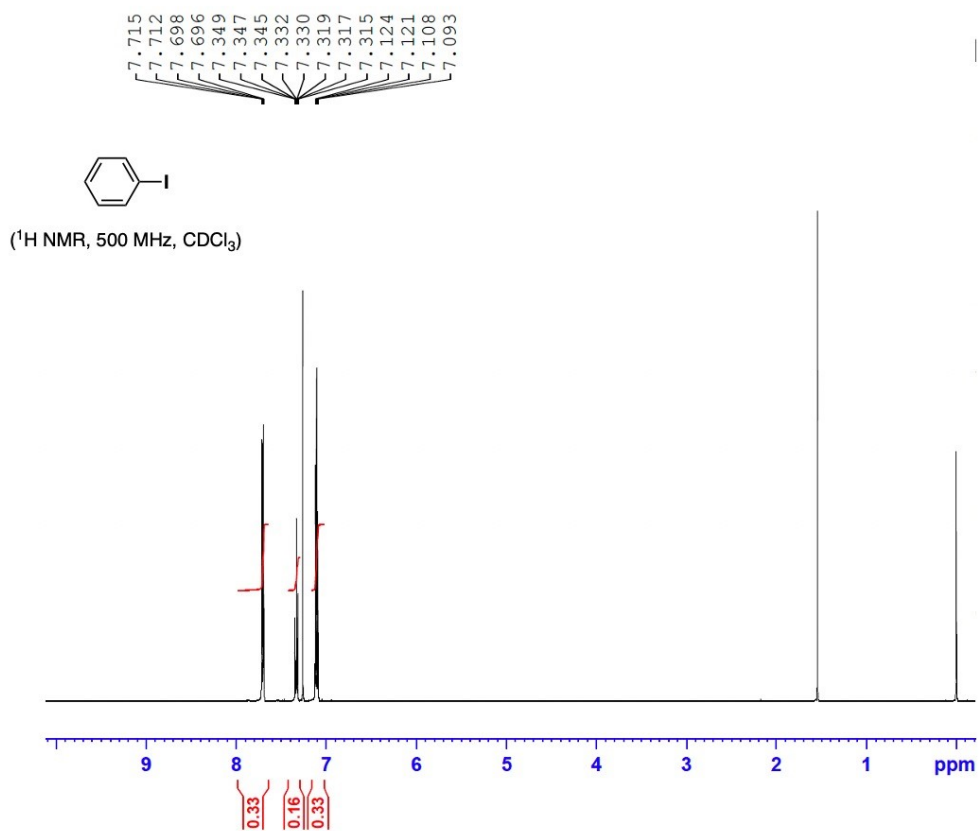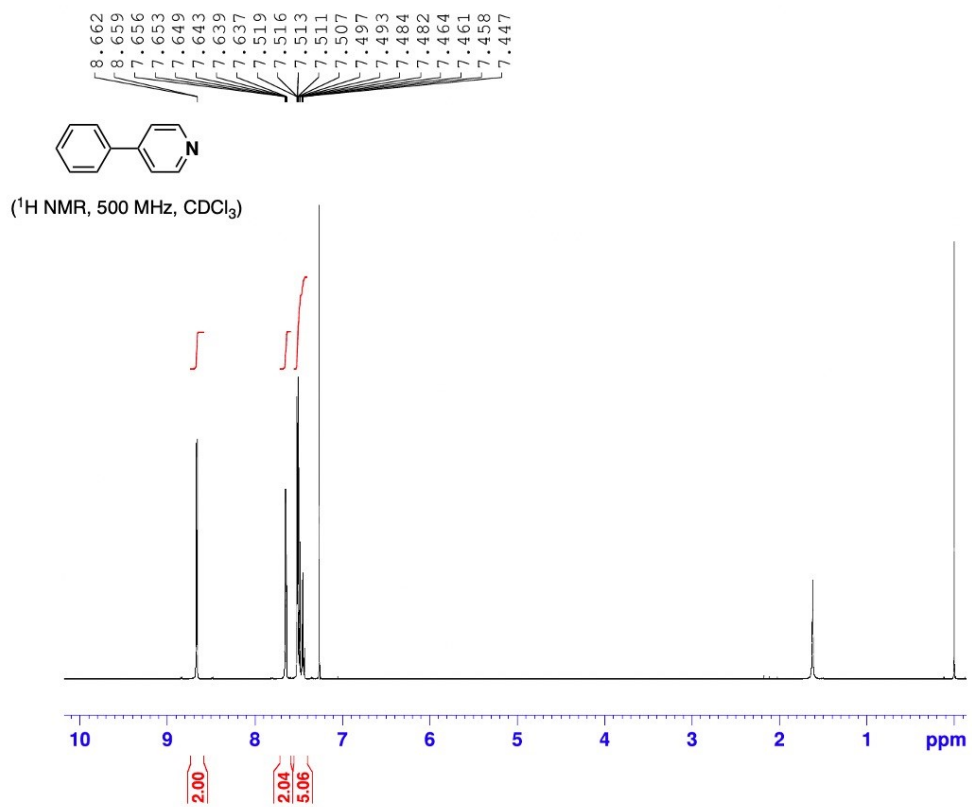

8.176  
8.175  
8.169  
8.165  
8.162  
8.158  
8.157  
7.870  
7.869  
7.864  
7.862  
7.858  
7.852  
7.851  
7.471  
7.465  
7.459  
7.453

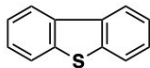

(<sup>1</sup>H NMR, 500 MHz, CDCl<sub>3</sub>)

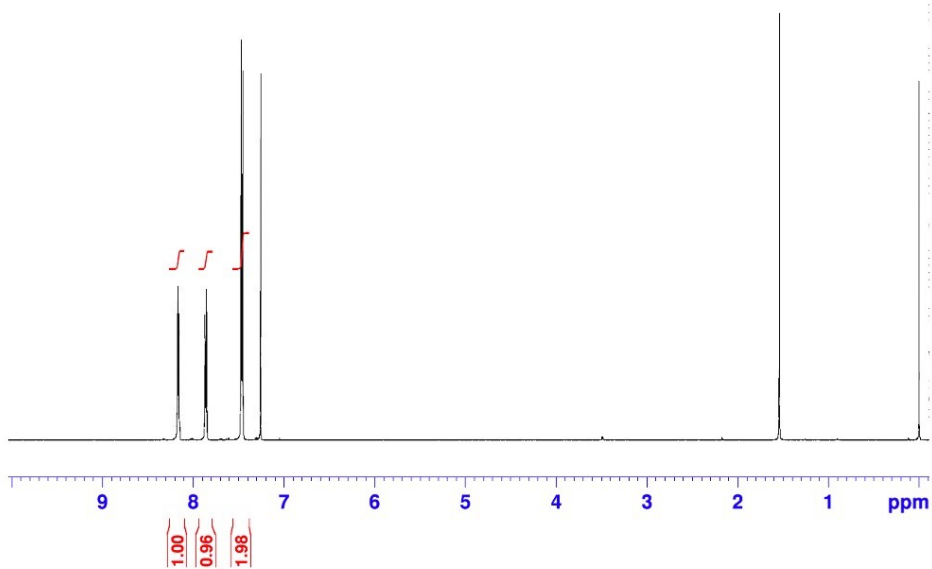

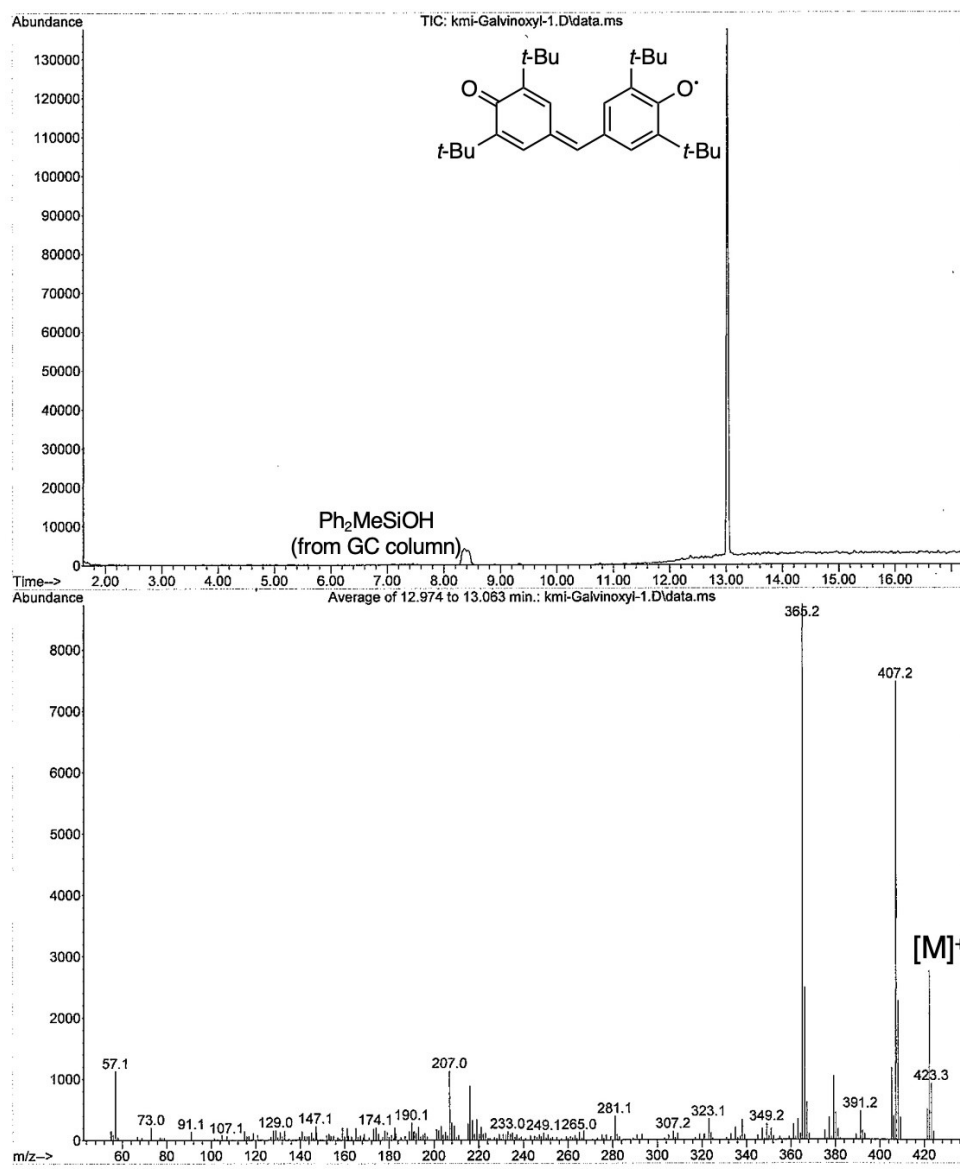

GCMS chromatograms (TIC chromatogram and MS spectrum) of galvinoxyl free radical. Ph<sub>2</sub>MeSiOH is a decomposed product of liquid stationary phases of GC column.
